# Supplementary figures and images for: Highly sensitive determination of reduced glutathione based on a cobalt nanoparticle implanted-modified indium tin oxide electrode
Source: Royal Society of Chemistry journal article supplement (doi:10.1039/c5an00631g), 2015-01-01

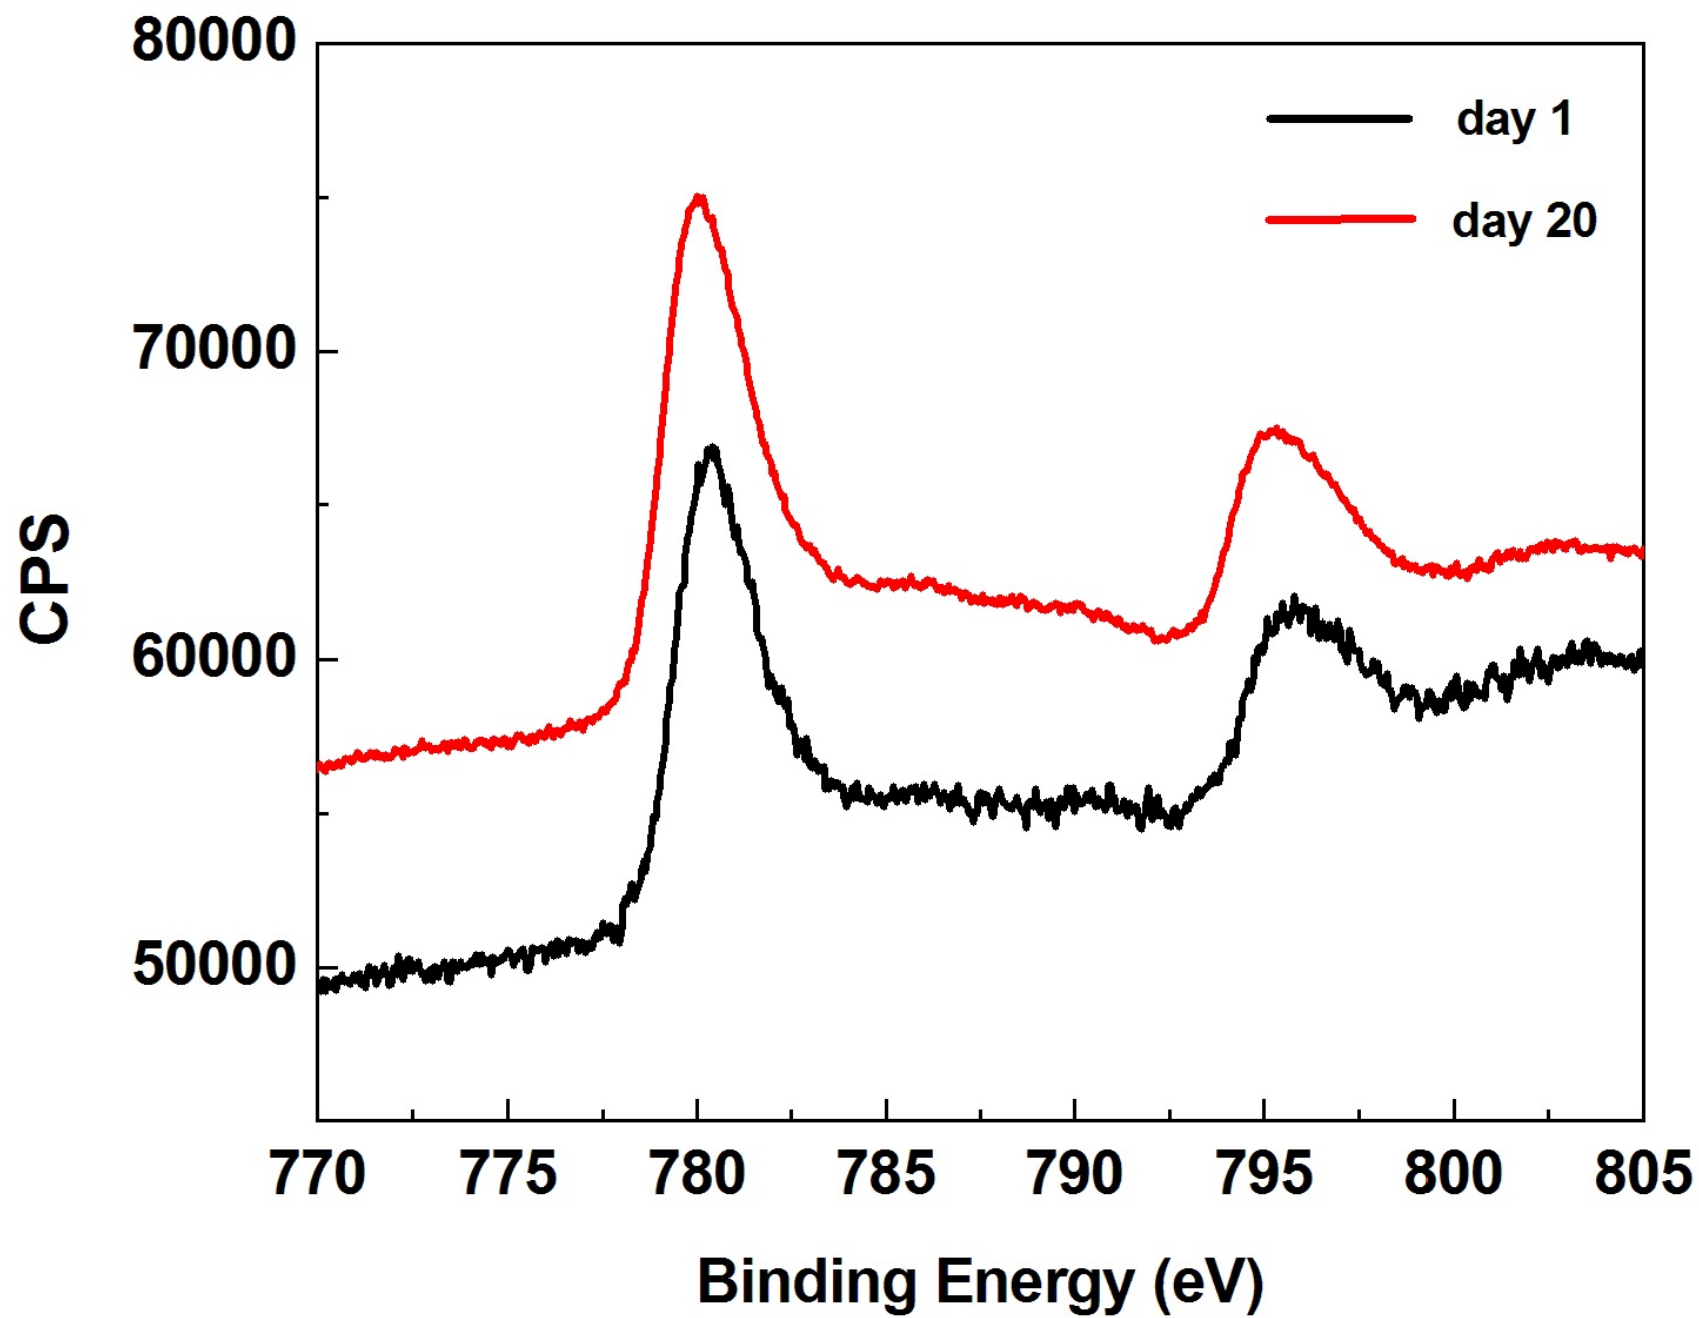

Supplement: c5an00631g2.pdf [file c5an00631g2.pdf]
